# Supplementary material for: Green synthesis of water-compatible molecularly imprinted resin on graphene oxide for highly selective extraction of chlorogenic acid in aqueous systems
Source: Royal Society of Chemistry journal article supplement (doi:10.1039/d4gc00626g), 2024-01-01
Supplement: d4gc00626g1.pdf [file d4gc00626g1.pdf]

## Supporting Information

### **Green synthesis of water-compatible molecularly imprinted resin on graphene oxide for highly selective extraction of chlorogenic acid in aqueous systems**

Yanan Yuan<sup>1,2</sup>, Yanfei Zhang<sup>1</sup>, Zhiqiang Wang<sup>2</sup>, Hongyuan Yan<sup>1,2,\*</sup>

<sup>1</sup>. *State Key Laboratory of New Pharmaceutical Preparations and Excipients, Key*

*Laboratory of Medicinal Chemistry and Molecular Diagnosis of Ministry of*

*Education, College of Chemistry and Materials Science, College of Pharmaceutical*

*Science, Hebei University, Baoding, 071002, China*

<sup>2</sup>. *Hebei Key Laboratory of Public Health Safety, College of Public Health, Hebei*

*University, Baoding, 071002, China*

---

\* Corresponding author. Tel.: +86-0312-5079788

E-mail address: [yanhy@hbu.edu.cn](mailto:yanhy@hbu.edu.cn)

## Contents

### Materials and reagents

### HPLC analysis

### Method validation

### Figures and Tables

**Fig. S1** Sample preparation and CPTE procedure.

**Fig. S2** The low-resolution (5000 $\times$ ) SEM images (a–c) and optical photograph (d) of SMIR/PGO; The SEM images of (e) SMIR/PGO (10000 $\times$ ) and (f) SNIR/PGO (10000 $\times$ ); N<sub>2</sub> adsorption–desorption isotherms and BJH size distribution isotherms of SMIR/PGO (g) and SNIR/PGO (h).

**Fig. S3** The fitting curves of a: pseudo-first-order model; b: pseudo-second-order model, and c: Elovich model for SMIR/PGO and SNIR/PGO.

**Fig. S4** Adsorption isotherm models of SMIR/PGO and SNIR/PGO. (a: Freundlich linear fits for CGA; b: Langmuir linear fits for CGA; c: Temkin linear fits for CGA).

**Fig. S5** Optimization of the extraction conditions. a: Adsorbent dosage; b: types of washing solvent (1: water; 2: methanol-water (1:9, v/v); 3: acetonitrile-water (1:9, v/v); 4: acetonitrile; 5: methanol-water (5:5, v/v); 6: methanol); c: the volume of washing solvent; d: types of elution solvent (1: acetonitrile-formic acid (9:1, v/v); 2: methanol-formic acid (9:1, v/v); 3: methanol-formic acid-water (8:1:1, v/v/v), 4: acetonitrile-water (9:1, v/v); 5: acetone-water (9:1, v/v)); e: volume of elution solvent; f: centrifugal speed.

**Fig. S6** Effect of adsorbent dosage, elution volume, centrifugal speed and their

reciprocal 3D response interaction on the recovery of CGA. (a: effect of adsorbent dosage and elution volume, b: effect of adsorbent dosage and centrifugal speed, c: effect of elution volume and centrifugal speed).

**Table S1** Parameters of the three kinetic models

**Table S2** Parameters of Langmuir, Freundlich, and Temkin adsorption isotherms

**Table S3** Experimental factors and levels in the central composite design

**Table S4** The central composite design with experimental results

**Table S5** ANOVA for the response surface model

**Table S6** Parameters of the SMIR/PGO-CPTE-HPLC method

|              |           |          |    |     |
|--------------|-----------|----------|----|-----|
| <b>Table</b> | <b>S7</b> | Recovery | of | CGA |
|--------------|-----------|----------|----|-----|

## Materials and reagents

Graphene oxide (GO) was acquired from Jining Leader Nano Technology Co., Ltd. (Shandong, China). Dopamine hydrochloride (DA), chlorogenic acid (CGA), caffeic acid (CFA), rutin (RU), kaempferol-3-rutinoside (K-3-RU) were procured from Beijing Innochem Science & Technology Co., Ltd. (Beijing, China). Hexamethylenetetramine (HMTA) was obtained from Huadong Chemical Co., Ltd. (Tianjin, China). Methanol and acetonitrile were obtained from Shanghai Xingke Co., Ltd. (Shanghai, China). Ultrapure water was filtered using a 0.22  $\mu\text{m}$  membrane before use. A standard stock solution of CGA ( $1.00\text{ mg mL}^{-1}$ ) was prepared in methanol.

## HPLC analysis

A Thermo UltiMate 3000 DGLC HPLC system (Thermo Fisher Scientific, USA) equipped with a Chromeleon 7.2 workstation, UV detector, and a chromatographic column (Accucore C<sub>18</sub>,  $100 \times 4.6\text{ mm}$ ,  $2.6\text{ }\mu\text{m}$ ) was employed for the determination of CGA. The mobile phase was water-acetonitrile (9:1, v/v, containing 0.1% TFA). The wavelength of the UV was set at 290 nm. The injection volume was 20  $\mu\text{L}$ .

## Method validation

The methodology parameters included detection limit (LOD), quantitation limit (LOQ), working range, trueness, and precision. The LOD and LOQ were calculated using the equation  $\text{LOD} = 3S_a/b$  and  $\text{LOQ} = 10S_a/b$ , where  $S_a$  is the standard deviation of the blank sample response and  $b$  is the slope of the calibration curve.<sup>1</sup> The working range was constructed by concentrations ( $0.02\text{--}25.00\text{ }\mu\text{g mL}^{-1}$ ) of CGA. And response values of each concentration are plotted on the y-axis against the concentrations of each

point. The trueness of the proposed method was assessed through recovery experiments using spiked samples at three spiking levels (0.5, 5.0, and 25  $\mu\text{g mL}^{-1}$ ). The method precision was represented as repeatability and reproducibility, which were calculated by extracting and quantifying each analyte from real matrix using the whole methods in one day (intra-day,  $n = 6$ ) and three consecutive days (inter-day,  $n = 3$ ), respectively.

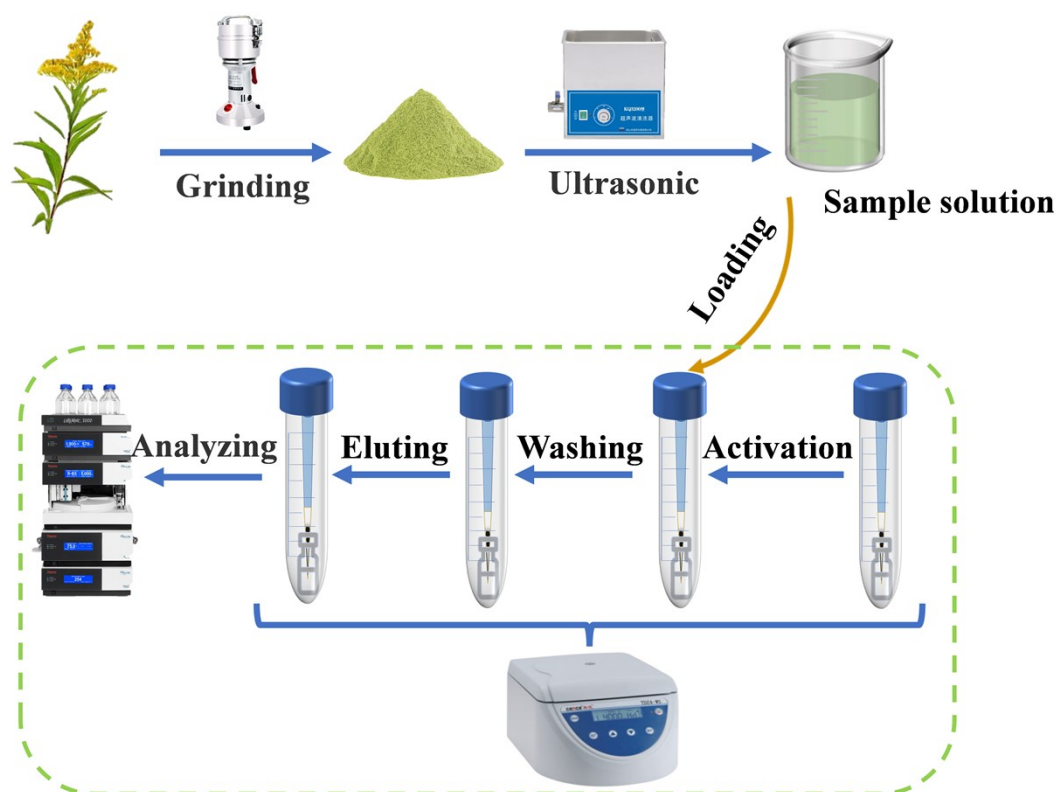

**Fig. S1** Sample preparation and CPTE procedure.

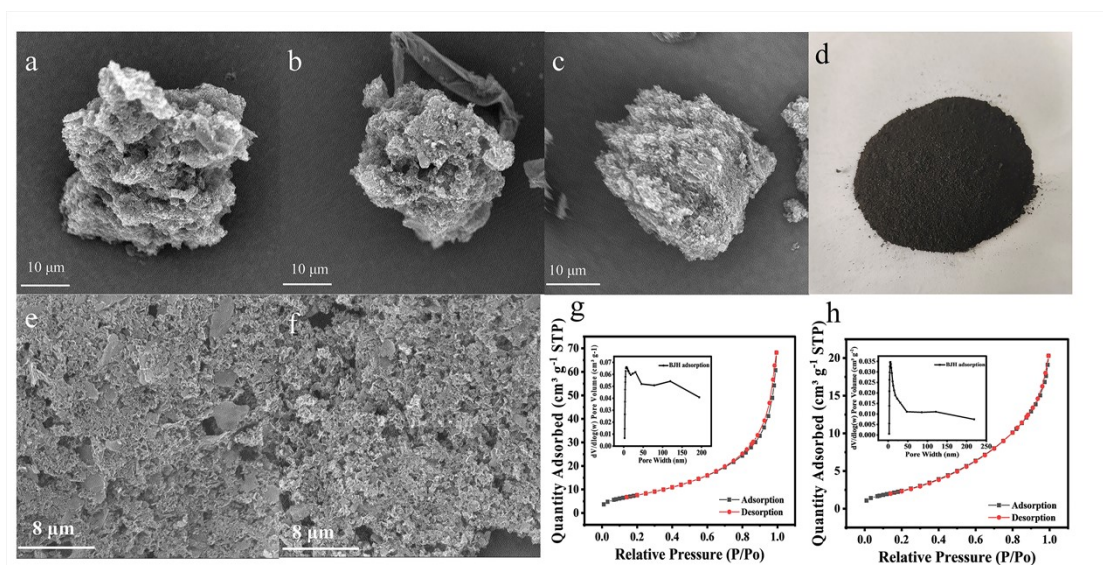

**Fig. S2** The low-resolution (5000×) SEM images (a–c) and optical photograph (d) of SMIR/PGO; The SEM images of (e) SMIR/PGO (10000×) and (f) SNIR/PGO (10000×); N<sub>2</sub> adsorption–desorption isotherms and BJH size distribution isotherms of SMIR/PGO (g) and SNIR/PGO (h).

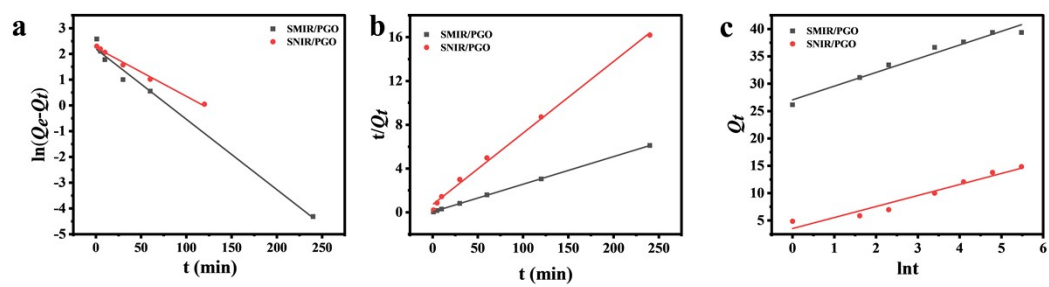

**Fig. S3** The fitting curves of a: pseudo-first-order model; b: pseudo-second-order model, and c:

Elovich model for SMIR/PGO and SNIR/PGO.

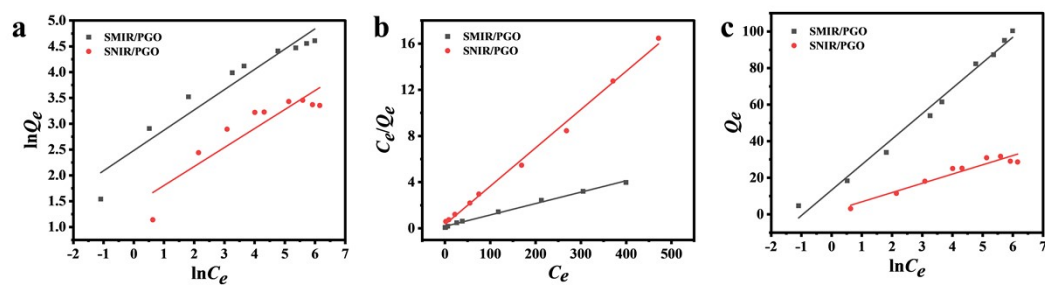

**Fig. S4** Adsorption isotherm models of SMIR/PGO and SNIR/PGO. (a: Freundlich linear fits for CGA; b: Langmuir linear fits for CGA; c: Temkin linear fits for CGA).

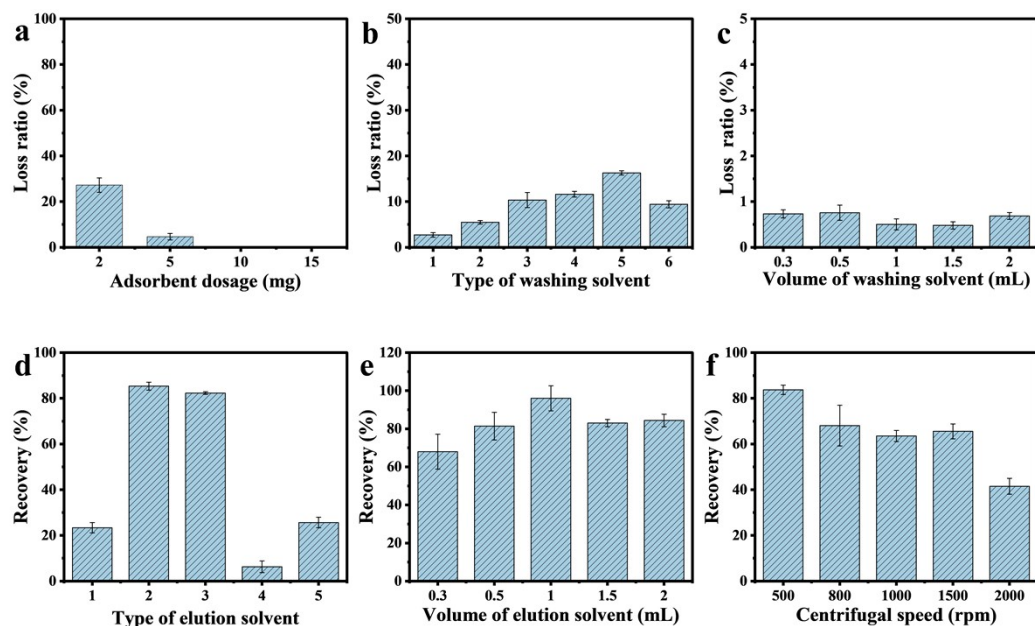

**Fig. S5** Optimization of the extraction conditions. a: Adsorbent dosage; b: types of washing solvent (1: water; 2: methanol-water (1:9, v/v); 3: acetonitrile-water (1:9, v/v); 4: acetonitrile; 5: methanol-water (5:5, v/v); 6: methanol); c: the volume of washing solvent; d: types of elution solvent (1: acetonitrile-formic acid (9:1, v/v); 2: methanol-formic acid (9:1, v/v); 3: methanol-formic acid-water (8:1:1, v/v/v), 4: acetonitrile-water (9:1, v/v); 5: acetone-water (9:1, v/v)); e: volume of elution solvent; f: centrifugal speed.

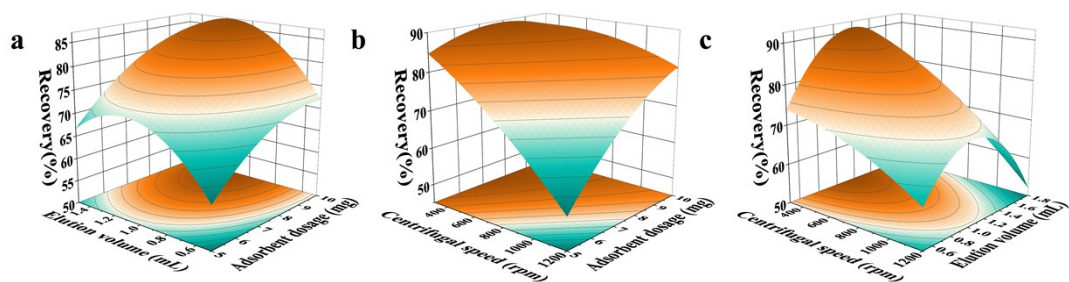

**Fig. S6** Effect of adsorbent dosage, elution volume, centrifugal speed and their reciprocal 3D

response interaction on the recovery of CGA. (a: effect of adsorbent dosage and elution volume, b:

effect of adsorbent dosage and centrifugal speed, c: effect of elution volume and centrifugal

speed).

**Table S1** Parameters of the three kinetic models

| Kinetic models            | Parameters                                                 | SMIR/PGO | SNIR/PGO |
|---------------------------|------------------------------------------------------------|----------|----------|
| Pseudo-first-order model  | $k_1$ ( $\text{min}^{-1}$ )                                | 0.0273   | 0.0189   |
|                           | $Q_e$ ( $\text{mg g}^{-1}$ )                               | 8.9835   | 9.4164   |
|                           | $R^2$                                                      | 0.9869   | 0.9894   |
| Pseudo-second-order model | $Q_e$ ( $\text{mg g}^{-1}$ )                               | 39.6196  | 15.2835  |
|                           | $k_s$ ( $\text{g} \cdot \text{mg}^{-1} \text{ min}^{-1}$ ) | 0.0149   | 0.0067   |
|                           | $R^2$                                                      | 0.9999   | 0.9960   |
| Elovich model             | a                                                          | 27.0512  | 3.5292   |
|                           | b                                                          | 2.5058   | 2.0140   |
|                           | $R^2$                                                      | 0.9617   | 0.9409   |

**Table S2** Parameters of Langmuir, Freundlich, and Temkin adsorption isotherms

| Isotherm   |          | Parameters                          |          |
|------------|----------|-------------------------------------|----------|
| Freundlich | SMIR/PGO | $n$                                 | 2.5445   |
|            |          | $K_f (\text{mL } \mu\text{g}^{-1})$ | 11.9676  |
|            |          | $R^2$                               | 0.9144   |
|            | SNIR/PGO | $n$                                 | 2.7174   |
|            |          | $K_f (\text{mL } \mu\text{g}^{-1})$ | 4.2046   |
|            |          | $R^2$                               | 0.8082   |
| Langmuir   | SMIR/PGO | $Q_m (\text{mg g}^{-1})$            | 101.3171 |
|            |          | $K_l (\text{mL } \mu\text{g}^{-1})$ | 0.0566   |
|            |          | $R^2$                               | 0.9943   |
|            | SNIR/PGO | $Q_m (\text{mg g}^{-1})$            | 30.1296  |
|            |          | $K_l (\text{mL } \mu\text{g}^{-1})$ | 0.0985   |
|            |          | $R^2$                               | 0.9948   |
| Temkin     | SMIR/PGO | $B_T$                               | 13.9420  |
|            |          | $A_T (\text{L mg}^{-1})$            | 2.5908   |
|            |          | $R^2$                               | 0.9852   |
|            | SNIR/PGO | $B_T$                               | 5.06288  |
|            |          | $A_T (\text{L mg}^{-1})$            | 1.4214   |
|            |          | $R^2$                               | 0.9182   |

**Table S3** Experimental factors and levels in the central composite design

| Factors                    | Levels   |             |           |            |            |
|----------------------------|----------|-------------|-----------|------------|------------|
|                            | Low (−1) | Central (0) | High (+1) | − $\alpha$ | + $\alpha$ |
| A: Adsorbent dosage (mg)   | 5.0      | 7.5         | 10        | 3.3        | 11.7       |
| B: Elution volume (mL)     | 0.5      | 1.0         | 1.5       | 0.16       | 1.84       |
| C: Centrifugal speed (rpm) | 500      | 750         | 1000      | 330        | 1170       |

**Table S4** The central composite design with experimental results

| Run | Adsorbent dosage<br>(mg) | Elution volume<br>(mL) | Centrifugal speed<br>(rpm) | Recovery<br>(%) |
|-----|--------------------------|------------------------|----------------------------|-----------------|
| 1   | 7.5                      | 1.0                    | 750                        | 86.5            |
| 2   | 5.0                      | 0.5                    | 500                        | 67.9            |
| 3   | 5.0                      | 1.5                    | 1000                       | 55.9            |
| 4   | 10                       | 1.5                    | 500                        | 85.5            |
| 5   | 11.7                     | 1.0                    | 750                        | 82.4            |
| 6   | 5.0                      | 1.5                    | 500                        | 75.9            |
| 7   | 7.5                      | 1.0                    | 750                        | 86.5            |
| 8   | 7.5                      | 1.0                    | 1170                       | 70.0            |
| 9   | 7.5                      | 1.84                   | 750                        | 67.5            |
| 10  | 7.5                      | 1.0                    | 750                        | 79.4            |
| 11  | 10.0                     | 0.5                    | 1000                       | 73.6            |
| 12  | 7.5                      | 1.0                    | 330                        | 87.7            |
| 13  | 5.0                      | 0.5                    | 1000                       | 53.9            |
| 14  | 7.5                      | 0.16                   | 750                        | 46.2            |
| 15  | 7.5                      | 1.0                    | 750                        | 86.5            |
| 16  | 10                       | 0.5                    | 500                        | 74.1            |
| 17  | 10                       | 1.5                    | 1000                       | 79.5            |
| 18  | 7.5                      | 1.0                    | 750                        | 78.6            |
| 19  | 3.3                      | 1.0                    | 750                        | 58.4            |
| 20  | 7.5                      | 1.0                    | 750                        | 78.7            |

**Table S5** ANOVA for the response surface model

| Source               | Sum of Squares | df | Mean Square | F-value | p-value  |                 |
|----------------------|----------------|----|-------------|---------|----------|-----------------|
| Model                | 2663.80        | 9  | 295.98      | 20.59   | < 0.0001 | significant     |
| A- Adsorbent dosage  | 724.40         | 1  | 724.40      | 50.39   | < 0.0001 |                 |
| B- Elution volume    | 291.66         | 1  | 291.66      | 20.29   | 0.0011   |                 |
| C- Centrifugal speed | 361.54         | 1  | 361.54      | 25.15   | 0.0005   |                 |
| AB                   | 6.66           | 1  | 6.66        | 0.4633  | 0.5115   |                 |
| AC                   | 94.53          | 1  | 94.53       | 6.58    | 0.0282   |                 |
| BC                   | 16.53          | 1  | 16.53       | 1.15    | 0.3088   |                 |
| A <sup>2</sup>       | 199.83         | 1  | 199.83      | 13.90   | 0.0039   |                 |
| B <sup>2</sup>       | 1045.34        | 1  | 1045.34     | 72.71   | < 0.0001 |                 |
| C <sup>2</sup>       | 7.80           | 1  | 7.80        | 0.5426  | 0.4783   |                 |
| Residual             | 143.77         | 10 | 14.38       |         |          | not significant |
| Lack of Fit          | 56.75          | 5  | 11.35       | 0.6521  | 0.6748   |                 |
| Pure Error           | 87.02          | 5  | 17.40       |         |          |                 |
| Cor Total            | 2807.57        | 19 |             |         |          |                 |

**Table S6** Parameters of the SMIR/PGO-CPTE-HPLC method

| Analyte | <i>r</i> | Regression equation   | Linearity<br>( $\mu\text{g mL}^{-1}$ ) | LOD<br>( $\text{ng mL}^{-1}$ ) | LOQ<br>( $\text{ng mL}^{-1}$ ) |
|---------|----------|-----------------------|----------------------------------------|--------------------------------|--------------------------------|
| CGA     | 0.9993   | $y = 0.524x + 0.1346$ | 0.02–25.00                             | 5.2                            | 17.2                           |

**Table S7** Recovery of CGA

| Analyte | 0.5 µg mL <sup>-1</sup> |         | 5.0 µg mL <sup>-1</sup> |         | 25 µg mL <sup>-1</sup> |         |
|---------|-------------------------|---------|-------------------------|---------|------------------------|---------|
|         | Recovery (%)            | RSD (%) | Recovery (%)            | RSD (%) | Recovery (%)           | RSD (%) |
| CGA     | 91.5                    | 5.5     | 95.4                    | 4.6     | 84.4                   | 2.5     |

## Reference

1. A. Shrivastava and V. Gupta, *Chron. Young Sci.*, 2011, **2**, 21–25.
